# Supplementary material for: Inflaming Public Interest: A Qualitative Study of Adult Learners’ Perceptions on Nutrition and Inflammation
Source: PubMed Central journal article supplement (PMC7071230; doi:10.3390/nu12020345), 2020-01-28
Supplement: nutrients-12-00345-s001.pdf [file nutrients-12-00345-s001.pdf]

**Table S1.** Qualitative Research Review Guidelines (RATS) checklist.

| <b>Qualitative Research Review Guidelines – RATS <sup>1</sup></b>                                                                                                                                                                                                                                                                                                     |                                                                                                                                                                                                                                   |                                                                      |
|-----------------------------------------------------------------------------------------------------------------------------------------------------------------------------------------------------------------------------------------------------------------------------------------------------------------------------------------------------------------------|-----------------------------------------------------------------------------------------------------------------------------------------------------------------------------------------------------------------------------------|----------------------------------------------------------------------|
| <b>Ask this of the manuscript</b>                                                                                                                                                                                                                                                                                                                                     | <b>This should be included in the manuscript</b>                                                                                                                                                                                  | <b>Where item has been addressed</b>                                 |
| <b>R – Relevance of study design</b>                                                                                                                                                                                                                                                                                                                                  |                                                                                                                                                                                                                                   |                                                                      |
| Is research question interesting?                                                                                                                                                                                                                                                                                                                                     | Research question explicitly stated                                                                                                                                                                                               | Question provided on page 1 and objectives provided on pages 2 and 6 |
| Is research question relevant to clinical practice, public health, or policy?                                                                                                                                                                                                                                                                                         | Research question justified and linked to the existing knowledge base (empirical research, theory, policy)                                                                                                                        | Pages 2 through to 6                                                 |
| <b>A – Appropriateness of qualitative method</b>                                                                                                                                                                                                                                                                                                                      |                                                                                                                                                                                                                                   |                                                                      |
| Is qualitative methodology the best approach for the study aims?<br><i>Interviews:</i> experience, perceptions, behavior, practice, process<br><i>Focus groups:</i> group dynamics, convenience, non-sensitive topics<br><i>Ethnography:</i> culture, organizational behavior, interaction<br><i>Textual analysis:</i> documents, art, representations, conversations | Study design described and justified e.g., why was a particular method (i.e., interviews) chosen?                                                                                                                                 | Pages 6 through to 8                                                 |
| <b>T – transparency of procedures</b>                                                                                                                                                                                                                                                                                                                                 |                                                                                                                                                                                                                                   |                                                                      |
| <b>Sampling</b><br>Are the participants selected the most appropriate to provide access to the type of knowledge sought by the study?<br><br>Is the sampling strategy appropriate?                                                                                                                                                                                    | Criteria for selecting the study sample justified and explained<br><i>theoretical:</i> based on pre conceived or emergent theory<br><i>purposive:</i> diversity of opinion<br><i>volunteer:</i> feasibility, hard-to-reach groups | Page 8                                                               |
| <b>Recruitment</b><br>Was recruitment conducted using appropriate methods?<br><br>Is the sampling strategy appropriate?<br><br>Could there be selection bias?                                                                                                                                                                                                         | Details of how recruitment was conducted and by whom<br><br>Details of who chose not to participate and why                                                                                                                       | Pages 6 through to 8<br><br>Pages 6 through to 8                     |

|                                                                                                                                                                                                                                                                 |                                                                                                                                                                                                                                                                                                                                                                                                                                               |                                                                                                                       |
|-----------------------------------------------------------------------------------------------------------------------------------------------------------------------------------------------------------------------------------------------------------------|-----------------------------------------------------------------------------------------------------------------------------------------------------------------------------------------------------------------------------------------------------------------------------------------------------------------------------------------------------------------------------------------------------------------------------------------------|-----------------------------------------------------------------------------------------------------------------------|
| <i>Data collection</i><br>Was collection of data systematic and comprehensive?                                                                                                                                                                                  | Method (s) outlined and examples given (e.g., interview questions)                                                                                                                                                                                                                                                                                                                                                                            | Page 7, Appendix Figure 1A and Appendix Table 2A                                                                      |
| Are characteristics of study group and setting clear?                                                                                                                                                                                                           | Study group and setting clearly described                                                                                                                                                                                                                                                                                                                                                                                                     | Page 6 and 7                                                                                                          |
| Why and when was data collection stopped, and is this reasonable?                                                                                                                                                                                               | End of data collection justified and described                                                                                                                                                                                                                                                                                                                                                                                                | Page 7                                                                                                                |
| <i>Role of researchers</i><br>Is the researcher(s) appropriate?                                                                                                                                                                                                 | Do the researchers occupy dual roles (clinician and researcher)?                                                                                                                                                                                                                                                                                                                                                                              | Page 10 and 11                                                                                                        |
| How might they bias (good and bad) the conduct of the study and results?                                                                                                                                                                                        | Are the ethics of this discussed? Do the researcher(s) critically examine their own influence on the formulation of the research question, data collection, and interpretation?                                                                                                                                                                                                                                                               | Page 23                                                                                                               |
| <i>Ethics</i><br>Was informed consent sought and granted?                                                                                                                                                                                                       | Informed consent process explicitly and clearly detailed                                                                                                                                                                                                                                                                                                                                                                                      | Page 8                                                                                                                |
| Were participants' anonymity and confidentiality ensured?                                                                                                                                                                                                       | Anonymity and confidentiality discussed                                                                                                                                                                                                                                                                                                                                                                                                       | Page 8                                                                                                                |
| Was approval from an appropriate ethics committee received?                                                                                                                                                                                                     | Ethics approval cited                                                                                                                                                                                                                                                                                                                                                                                                                         | Page 8                                                                                                                |
| <b>S - Soundness of interpretive approach</b>                                                                                                                                                                                                                   |                                                                                                                                                                                                                                                                                                                                                                                                                                               |                                                                                                                       |
| <i>Analysis</i><br>Is the type of analysis appropriate for the type of study?<br><i>Thematic:</i> exploratory, descriptive, hypothesis generating<br><i>Framework:</i> e.g. policy<br><i>Constant comparison/grounded theory:</i> theory generating, analytical | Analytic approach described in depth and justified<br><br>Indicators of quality:<br>Description of how themes were developed from the data (inductive or deductive)<br>Evidence of alternative explanations being sought<br>Analysis and presentation of negative or deviant cases<br>Description of the basis on which quotes were chosen<br>Semi-quantification when appropriate<br>Illumination of context and/or meaning, richly detailed | Pages 8 through to 10<br><br>Pages 8 through to 10, Appendix Table 3A, 4A and 5A<br><br>Table 3 and Appendix Table 5A |
| Are the interpretations clearly presented and adequately supported by the evidence?                                                                                                                                                                             |                                                                                                                                                                                                                                                                                                                                                                                                                                               |                                                                                                                       |
| Are quotes used and are these appropriate and effective?                                                                                                                                                                                                        |                                                                                                                                                                                                                                                                                                                                                                                                                                               |                                                                                                                       |

|                                                                                                                    |                                                                                                                                                                                                                                                                                                                                                                                                                                                                                                             |                                             |
|--------------------------------------------------------------------------------------------------------------------|-------------------------------------------------------------------------------------------------------------------------------------------------------------------------------------------------------------------------------------------------------------------------------------------------------------------------------------------------------------------------------------------------------------------------------------------------------------------------------------------------------------|---------------------------------------------|
| Was trustworthiness/reliability of the data and interpretations checked?                                           | Method of reliability check described and justified e.g., was an audit trail, triangulation, or member checking employed?<br><br>Did an independent analyst review data and contest themes? How were disagreements resolved?                                                                                                                                                                                                                                                                                | Pages 8 through to 10 and Appendix Table 4A |
| <i>Discussion and presentation</i><br>Are findings sufficiently grounded in a theoretical or conceptual framework? | Findings presented with reference to existing theoretical and empirical literature, and how they contribute                                                                                                                                                                                                                                                                                                                                                                                                 | Pages 18 through to 22                      |
| Is adequate account taken of previous knowledge and how the findings add?                                          | Strengths and limitations explicitly described and discussed                                                                                                                                                                                                                                                                                                                                                                                                                                                | Pages 22 and 23                             |
| Are the limitations thoughtfully considered?                                                                       | Evidence following guidelines (format, word count)                                                                                                                                                                                                                                                                                                                                                                                                                                                          | Pages 1 through to 29 and Title page        |
| Is the manuscript well written and accessible?                                                                     | Detail of methods or additional quotes, contained in appendix<br><br>Written for a health sciences audience                                                                                                                                                                                                                                                                                                                                                                                                 | Appendix                                    |
| Are red flags present?                                                                                             | Grounded theory; not a simple content analysis but a complex, sociological, theory generating approach<br><br><i>Jargon</i> : descriptions that are trite or jargon filled should be viewed skeptically<br><br><i>Over interpretation</i> : interpretation must be grounded in "accounts" and semi-quantified if possible or appropriate<br><br><i>Seems anecdotal, self-evident</i> : may be a superficial analysis, not rooted in conceptual framework or linked to previous knowledge, and lacking depth | -                                           |

---

*Consent process thinly  
discussed:* may not have met  
ethics requirements

*Doctor-researcher:* consider the  
ethical implications for patients  
and the bias in data  
collection and interpretation

---

<sup>1</sup>The RATS guidelines modified for BioMed Central are copyright Jocalyn Clark, BMJ. They can be found in Clark JP: **How to peer review a qualitative manuscript**. In *Peer Review Health Sciences*. Second edition. Edited by Godlee F, Jefferson T. London: BMJ Books; 2003:219-235
